# Supplementary material
Source: MDPI journal article supplement (https://www.mdpi.com/2076-3417/10/1/376)
Supplement: s1 [file s1]

## Supplementary Material

Adsorption performance of physically activated biochars for postcombustion CO<sub>2</sub> capture from dry and humid flue gas

Joan J. Manyà \*, David García-Morcate, Belén González

*Aragón Institute of Engineering Research (I3A), Technological College of Huesca, University of Zaragoza, crta. Cuarte s/n, Huesca E-22071, Spain*

**Proximate and ultimate analyses.** Proximate analyses of the biomass sources (VS and WS) and activated biochars were performed in quadruplicate according to ASTM standards (D3173 for moisture, D3174 for ash, and D3175 for volatile matter). Ultimate (elemental) analyses were carried out using a combustion elemental analysis Leco CHN628 (Leco Corporation, USA).

**Estimation of textural parameters of activated biochars.** From the N<sub>2</sub> adsorption/desorption isotherms at -196 °C, the apparent specific surface area ( $S_{BET}$ ) was calculated using the Brunauer–Emmet–Teller (BET) model at small relative pressures ( $p/p^0 = 0.01–0.10$ ). A Non-Local Density Functional Theory (NLDFT) method assuming slit-pore geometry was used to estimate the Pore Size Distribution (PSD) for pore sizes above 0.9–1.0 nm and the micropore and mesopores volumes ( $V_{mic}$  and  $V_{mes}$ , respectively).

Narrow micropore size distributions (up to 0.8–0.9 nm) and the volume of ultra-micropores ( $V_{ultra}$ , for pore sizes lower than 0.7 nm) of activated carbons were estimated from their CO<sub>2</sub> adsorption isotherms at 0 °C. A Density Functional Theory (DFT) method assuming slit-pore geometry was employed.

All the calculations were performed using the MicroActive software (v. 4.03) supplied by Micromeritics (USA).

**Determination of key performance indicators from dry breakthrough experiments.** First, the experimental breakthrough curves were corrected by subtracting the dead time, which was previously estimated from the blank tests. From the corrected curves, the volumetric flows of CO<sub>2</sub> and N<sub>2</sub> at the outlet were calculated as follows:

$$\dot{V} = \dot{V}_{N_2} + \left( \frac{I}{F_{CO_2}} \right) \dot{V}_{CO_2} \quad (A.1)$$

$$y_{CO_2} = \frac{\dot{V}_{CO_2}}{(\dot{V}_{CO_2} + \dot{V}_{N_2})} \quad (A.2)$$

where  $\dot{V}$  is the total volumetric flow rate (at STP conditions) at the outlet of the adsorption column (which is continuously measured using a mass flow meter, as shown in Fig. 1), whereas  $\dot{V}_{CO_2}$  and  $\dot{V}_{N_2}$  correspond to the outlet volumetric flow rates of CO<sub>2</sub> and N<sub>2</sub>, respectively. Since the mass flow meter used here was calibrated for pure N<sub>2</sub>, a correction factor ( $F_{CO_2} = 0.74$ ) was applied for quantifying  $\dot{V}_{CO_2}$ . The analyzer from ABB (see Section 2.3) continuously monitored the outlet composition of CO<sub>2</sub> in molar fraction ( $y_{CO_2}$ ).

Once the outlet volumetric flow rates of both CO<sub>2</sub> and N<sub>2</sub> were determined, the specific adsorption amounts ( $q_i$ , in mmol g<sup>-1</sup>) for each gas were estimated through the following equations:

$$q_{CO_2} = \frac{I}{m_b} \left[ \int_0^{t_s} (\dot{V}_{IN,CO_2} - \dot{V}_{CO_2}) \frac{I}{22.4} dt - \frac{Py_{CO_2}\epsilon V_b}{RT} \right] \quad (A.3)$$

$$q_{N_2} = \frac{I}{m_b} \left[ \int_0^{t_s} (\dot{V}_{IN,N_2} - \dot{V}_{N_2}) \frac{I}{22.4} dt - \frac{P(1 - y_{CO_2})\epsilon V_b}{RT} \right] \quad (A.4)$$

where  $m_b$  is the mass of adsorbent in g,  $\dot{V}_{IN,i}$  corresponds to the inlet volumetric flow rate (at STP conditions,  $\text{cm}^3 \text{s}^{-1}$ ) of gas constituent  $i$ , and  $t_s$  is the time required to reach the  $\text{CO}_2$  concentration in the feed (i.e.,  $C/C_0 = 1$ ). Eqs. (S3) and (S4) contain correction terms that account for the gas trapped in the void fraction of the bed ( $P$ : absolute pressure,  $\varepsilon$ : porosity of the bed,  $V_b$ : total volume of the bed,  $T$ : adsorption temperature).

The breakthrough time ( $t_b$ ) was defined as the time elapsed from the beginning of the adsorption and the instant at which  $\text{CO}_2$  was detected in the outlet stream. Hence, the percentage of used bed was determined from the ratio of the specific  $\text{CO}_2$  uptake at  $t_b$  to that obtained at  $t_s$ . The experimental values of selectivity  $\text{CO}_2/\text{N}_2$  were calculated as follows:

$$S = \frac{q_{\text{CO}_2} (P - p_{\text{CO}_2})}{q_{\text{N}_2} p_{\text{CO}_2}} \quad (\text{A.5})$$

where  $q_{\text{CO}_2}$  and  $q_{\text{N}_2}$  correspond to the adsorption capacities determined using Eqs. (A.3) and (A.4), respectively.

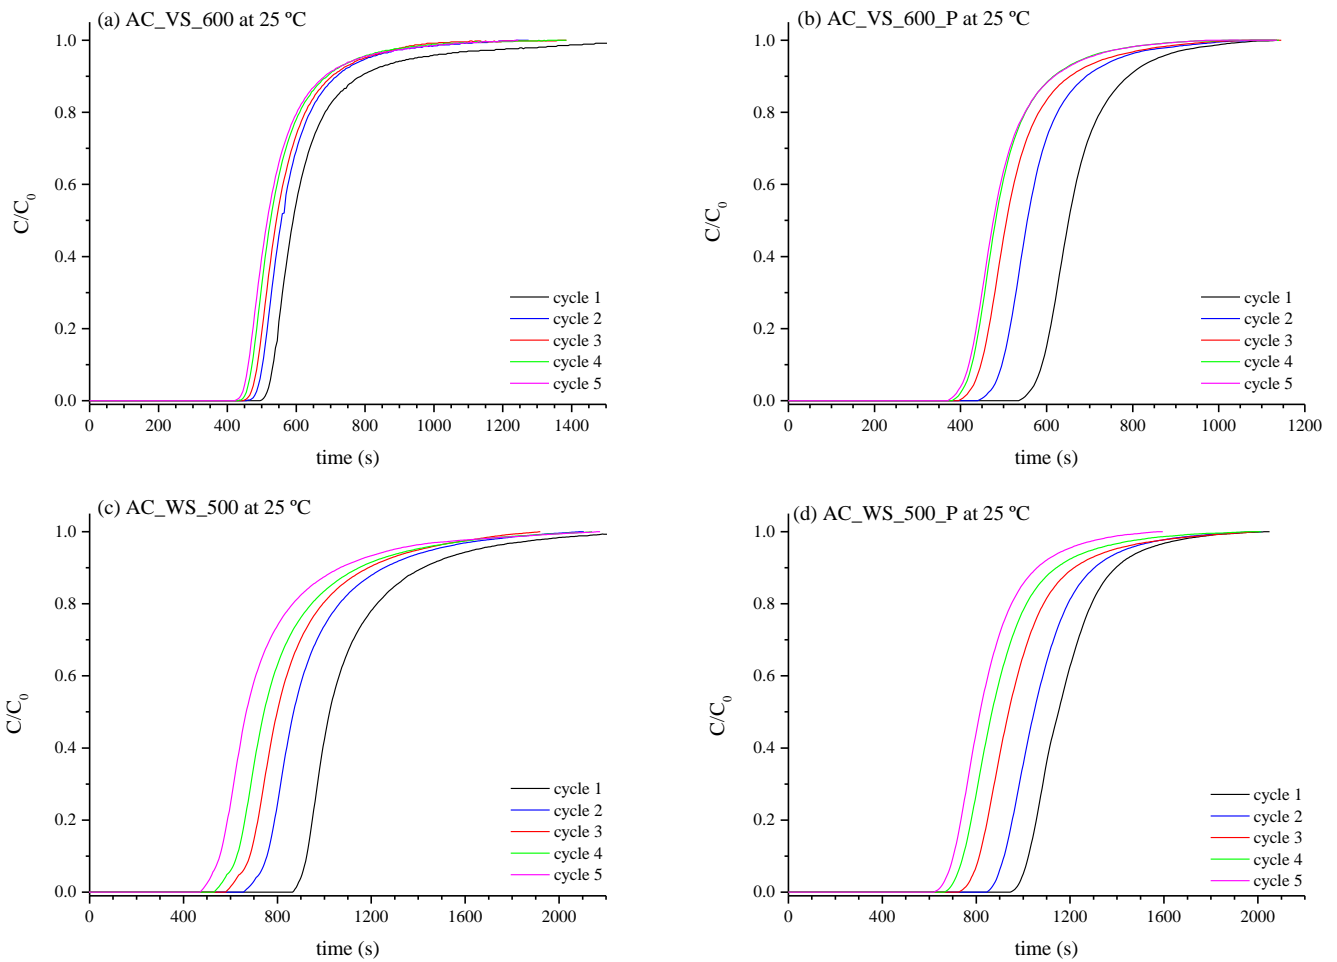

**Figure A.1.**  $\text{CO}_2$  breakthrough curves for five consecutive cycles (adsorption temperature =  $25^\circ\text{C}$ ) from a dry binary mixture of  $\text{N}_2$  and  $\text{CO}_2$  (with a  $\text{CO}_2$  composition of 13.75–14.25 vol. %).
